# Supplementary material for: The First Homologous Expression System for the β-Lytic Protease of Lysobacter capsici VKM B-2533T, a Promising Antimicrobial Agent
Source: MDPI journal article supplement (doi:10.3390/ijms23105722), 2022-05-20
Supplement: s1 [file s1]

**Supplementary Table S1.** Fluorescence intensity in cells of *L. capsici* strains.

| <i>L. capsici</i> strains                           | Fluorescence intensity, arbitrary units $\times 10^7$ |
|-----------------------------------------------------|-------------------------------------------------------|
| Wild-type <i>L. capsici</i> VKM B-2533 <sup>T</sup> | 0.083 $\pm$ 0.011                                     |
| <i>L. capsici</i> P <sub>GroEL</sub> -gfp           | 1.557 $\pm$ 0.101                                     |
| <i>L. capsici</i> P <sub>GroEL(A)</sub> -gfp        | 3.625 $\pm$ 0.377                                     |
| <i>L. capsici</i> P <sub>T5</sub> -gfp              | 46.750 $\pm$ 3.366                                    |

Results are shown as means  $\pm$  standard deviations. The mean values were obtained in three independent experiments: two independent experiments with two technical replicates and one independent experiment with six technical replicates.

**Supplementary Table S2.** Relative level of expression of the *blp* gene in cells of *L. capsici* strains.

| <i>L. capsici</i> strains                            | Relative level of expression of the <i>blp</i> gene |
|------------------------------------------------------|-----------------------------------------------------|
| <i>L. capsici</i> VKM B-2533 <sup>T</sup>            | 1.02 $\pm$ 0.21                                     |
| <i>L. capsici</i> P <sub>GroEL(A)</sub> - <i>blp</i> | 250.59 $\pm$ 82.42                                  |
| <i>L. capsici</i> P <sub>T5</sub> - <i>blp</i>       | 679.94 $\pm$ 271.38                                 |

Results are shown as means  $\pm$  standard deviations.

The mean values were obtained in four independent experiments, each with two technical replicates.

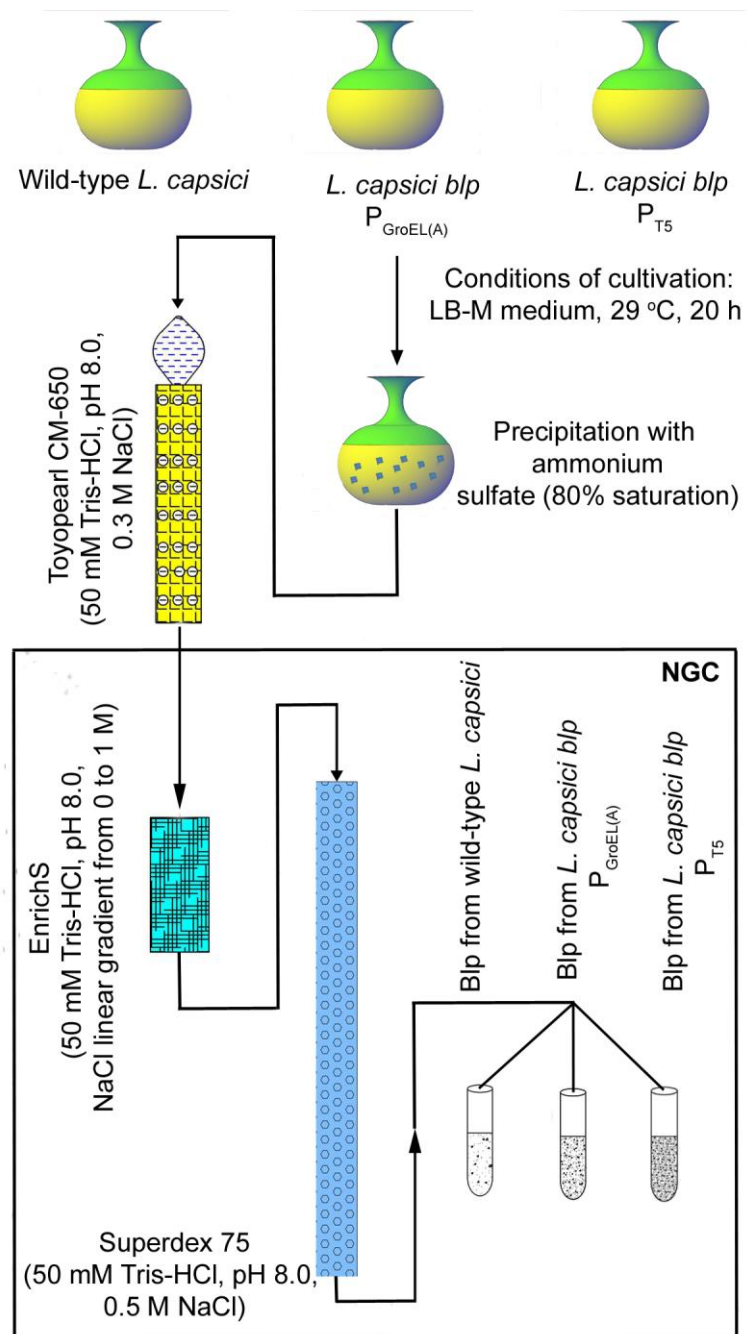

**Supplementary Figure S1.** Scheme of Blp protein purification from the culture liquid of *L. capsici* strains.

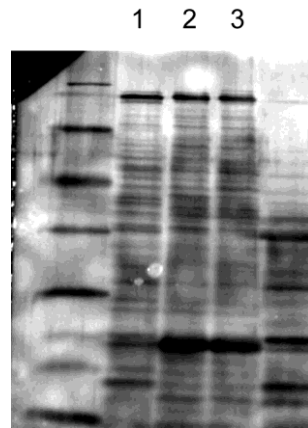

**Supplementary Figure S2.** Original gel image for Figure 3a: lanes 1, 2, 3 correspond to samples of culture liquid of *L. capsici* strains of Figure 3a.

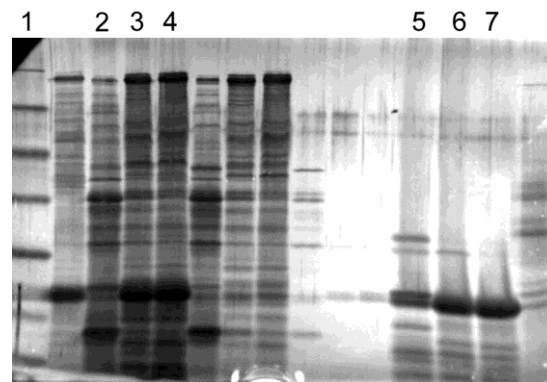

**Supplementary Figure S3.** Original gel images for Figure 3a: lane 1 corresponds to M of Figure 3a; lanes 2, 3, 4 correspond to samples after ammonium sulfate precipitation of Figure 3a; lanes 5, 6, 7 correspond to samples after Toyopearl CM-650 of Figure 3a.

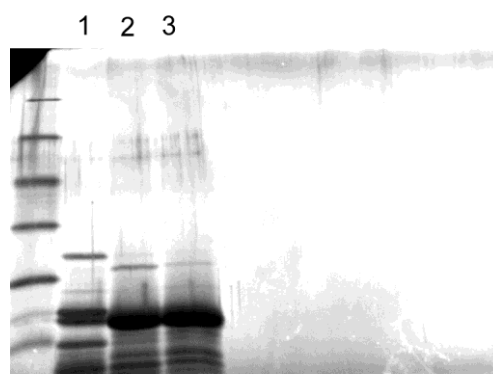

**Supplementary Figure S4.** Original gel images for Figure 3a: lanes 1, 2, 3 correspond to samples after EnrichS of Figure 3a.

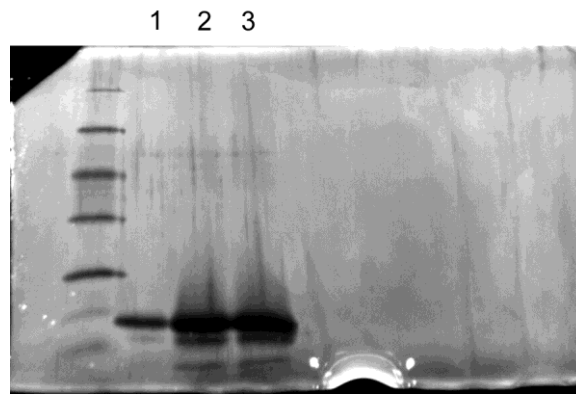

**Supplementary Figure S5.** Original gel images for Figure 3a: lanes 1, 2, 3 correspond to samples after Superdex75 of Figure 3a.

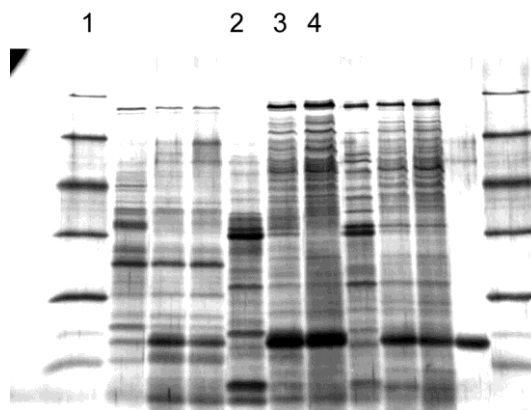

**Supplementary Figure S6.** Original gel images for Figure 4a: lane 1 corresponds to M of Figure 4a; lanes 2, 3, 4 correspond to samples of culture liquid of *L. capsici* strains of Figure 4a.

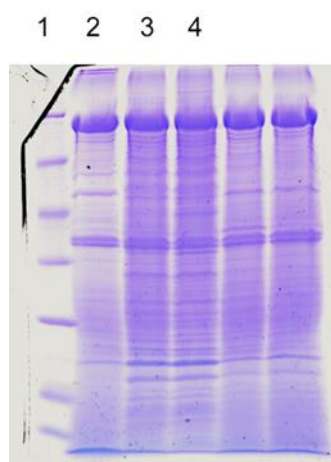

**Supplementary Figure S7.** Original gel images for Figure 4b: lane 1 corresponds to M of Figure 4b; lanes 2, 3, 4 correspond to samples of *L. capsici* strains cells of Figure 4b.

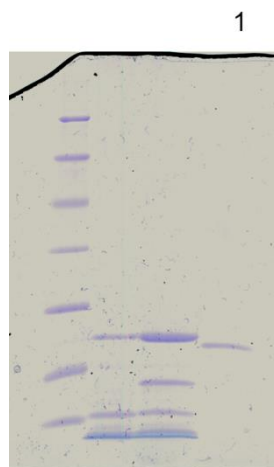

**Supplementary Figure S8.** Original gel images for Figure 4b: lane 1 corresponds to sample of purified Blp of *L. capsici* VKM B-2533<sup>T</sup> strain of Figure 4b.

**Supplementary Table S3.** Relative level of expression of the *alpA* gene.

| <i>L. capsici</i> strains                 | Relative level of expression of the <i>alpA</i> gene |
|-------------------------------------------|------------------------------------------------------|
| <i>L. capsici</i> VKM B-2533 <sup>T</sup> | 1.04±0.30                                            |
| <i>L. capsici</i> P <sub>T5-blp</sub>     | 0.17±0.09***                                         |

Results are shown as means ± standard deviations. The mean values were obtained in four independent experiments, each with two technical replicates. The two groups were compared using Student's *t*-test,  $p = 8.014 \times 10^{-9}$ .

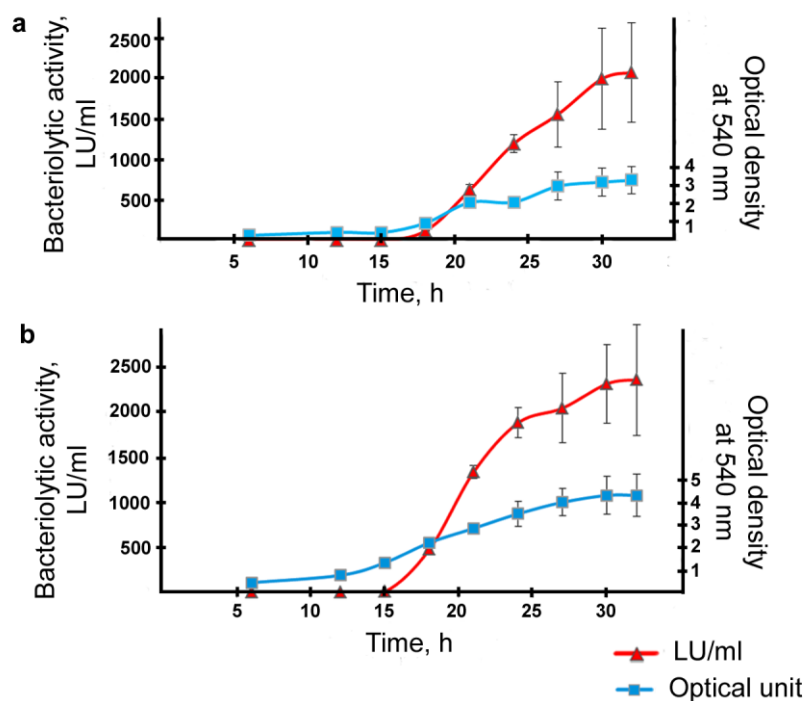

**Supplementary Figure S9.** Dynamics of growth and development of the bacteriolytic activity of *L. capsici* P<sub>T5-blp</sub> strain at the cultivation on RM medium. **(a)** Cultivation in flask. **(b)** Cultivation in ANKUM-2M fermenter.

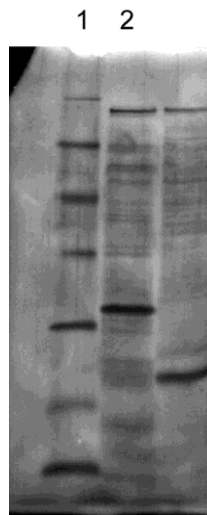

**Supplementary Figure S10.** Original gel images for Figure 6a: lane 1 corresponds to M of Figure 6a; lane 2 corresponds to sample of culture liquid of *L. capsici* P<sub>T5-serp</sub> strain of Figure 6a.

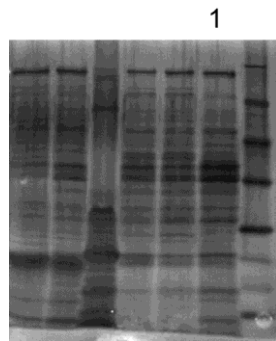

**Supplementary Figure S11.** Original gel images for Figure 6a: lane 1 corresponds to sample of culture liquid of wild-type *L. capsici* strain of Figure 6a.

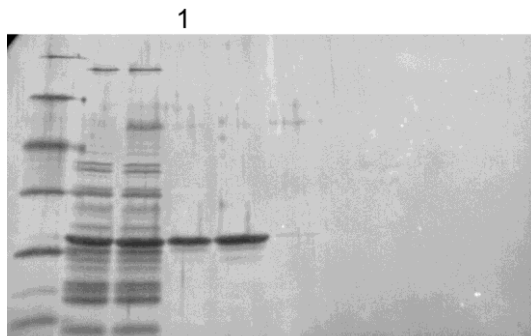

**Supplementary Figure S12.** Original gel images for Figure 6a: lane 1 corresponds to sample of purified Serp of *L. capsici* VKM B-2533<sup>T</sup> strain of Figure 6a.

**Supplementary Table S4.** Relative level of expression of the *serp* gene.

| <i>L. capsici</i> strains                 | Relative level of expression of the <i>serp</i> gene |
|-------------------------------------------|------------------------------------------------------|
| <i>L. capsici</i> VKM B-2533 <sup>T</sup> | 1.04±0.27                                            |
| <i>L. capsici</i> P <sub>T5-serp</sub>    | 608.58±238.17***                                     |

Results are shown as means ± standard deviations. The mean values were obtained in four independent experiments, each with two technical replicates. The two groups were compared using an unpaired two-tailed Student’s *t*-test,  $p = 2 \times 10^{-15}$ .

**Supplementary Table S5.** Oligonucleotides used in this work for cloning and sequencing.

| Primers                              | Sequence                               | Purpose                                                                                                                                                                                                                                                                   |
|--------------------------------------|----------------------------------------|---------------------------------------------------------------------------------------------------------------------------------------------------------------------------------------------------------------------------------------------------------------------------|
| Oligonucleotides used for cloning    |                                        |                                                                                                                                                                                                                                                                           |
| T5_KpnI (for)                        | GGTACCGTGCCACCTGACGTCTAAG              | To amplify a 1063 bp fragment containing T5 promoter – <i>gfp</i> – lambda t0 terminator from plasmid pTurboGFP-B                                                                                                                                                         |
| T5_XbaI (rev)                        | TCTAGACTGAAAATCTCGCCA AGCTAGC          |                                                                                                                                                                                                                                                                           |
| Gro_KpnI (for)                       | GGTACCCGGACCGACGCCTGTCA                | To amplify a 199 bp promoter GroEL from <i>L. enzymogenes</i> VKM B-2235 <sup>T</sup> DNA                                                                                                                                                                                 |
| Gro_HindIII (rev)                    | AAGCTTGGCGACCTCTGTAAGTAATTGAATTG<br>G  |                                                                                                                                                                                                                                                                           |
| GFP_HindIII (for)                    | AAGCTTATGGAGAGCGACGAGAGCGG             | To amplify a 705 bp <i>gfp</i> from plasmid pTurboGFP-B                                                                                                                                                                                                                   |
| GFP_BamHI (rev)                      | GGATCCTCATTCTTCACCGGCATCTGC            |                                                                                                                                                                                                                                                                           |
| Term_BamHI (for)                     | GGATCCCAAATAAAAACGAAAGGCTCAGTCG        | To amplify a 230 bp <i>rrnB</i> T1 and T2 transcriptional terminators from plasmid pEX18                                                                                                                                                                                  |
| Term_XbaI (rev)                      | TCTAGAAGAGTTTGTAGAAACGCAAAAAGGC        |                                                                                                                                                                                                                                                                           |
| Gro_KpnI (for)                       | GGTACCCGGACCGACGCCTGTCA                | To amplify a 200 bp promoter GroEL from plasmid PBBR1-MCS5 P <sub>GroEL</sub> - <i>gfp</i>                                                                                                                                                                                |
| Gro(A)_HindIII (rev)                 | AAGCTTTGGCGACCTCTGTAAGTAATTGAATT<br>GG |                                                                                                                                                                                                                                                                           |
| Blp1_HindIII (for)                   | AAGCTTATGAAGGCGATTTCGGGAGC             | To amplify a 1143 bp <i>blp</i> from <i>L. capsici</i> VKM B-2533 <sup>T</sup> DNA                                                                                                                                                                                        |
| BlpI_BamHI (rev)                     | GGATCCTCAGTTCGGGCCTGGG                 |                                                                                                                                                                                                                                                                           |
| Blp2_BamHI (for)                     | GGATCCATGAAGGCGATTTCGGGAGC             | To amplify a 1143 bp <i>blp</i> from plasmid PBBR1-MCS5 P <sub>GroEL(A)</sub> - <i>blp</i>                                                                                                                                                                                |
| Blp2_HindIII (rev)                   | AAGCTTTCAGTTCGGGCCTGGG                 |                                                                                                                                                                                                                                                                           |
| Serp_BamHI (for)                     | GGATCCATGATCCGCAAGAACGCACTTTG          | To amplify a 1383 bp <i>serp</i> from <i>L. capsici</i> VKM B-2533 <sup>T</sup> DNA                                                                                                                                                                                       |
| Serp_HindIII (rev)                   | AAGCTTTCA GGGATTGAAATAGCTCGACACG       |                                                                                                                                                                                                                                                                           |
| Oligonucleotides used for sequencing |                                        |                                                                                                                                                                                                                                                                           |
| Gro_KpnI (for)                       | GGTACCCGGACCGACGCCTGTCA                | To confirm the correctness of the cloned fragments and the absence of random mutations in the constructed vectors<br><br>PBBR1-MCS5 P <sub>GroEL</sub> - <i>gfp</i> ,<br>PBBR1-MCS5 P <sub>GroEL(A)</sub> - <i>gfp</i> ,<br>PBBR1-MCS5 P <sub>GroEL(A)</sub> - <i>blp</i> |
| Term_XbaI (rev)                      | TCTAGAAGAGTTTGTAGAAACGCAAAAAGGC        |                                                                                                                                                                                                                                                                           |
| T5_KpnI (for)                        | GGTACCGTGCCACCTGACGTCTAAG              | To confirm the correctness of the cloned fragments and the absence of random mutations in the constructed vectors<br><br>PBBR1-MCS5 P <sub>T5</sub> - <i>gfp</i> ,<br>PBBR1-MCS5 P <sub>T5</sub> - <i>blp</i> ,<br>PBBR1-MCS5 P <sub>T5</sub> - <i>serp</i>               |
| T5_XbaI (rev)                        | TCTAGACTGAAAATCTCGCCAAGCTAGC           |                                                                                                                                                                                                                                                                           |

**Supplementary Table S6.** Concentration of DNA template for PCR reaction.

| DNA template                                      | Final concentration, ng/ $\mu$ L | Purpose                                                                                           |
|---------------------------------------------------|----------------------------------|---------------------------------------------------------------------------------------------------|
| pTurboGFP-B                                       | 1.58                             | To amplify a 1063 bp fragment containing T5 promoter – <i>gfp</i> – lambda t0 terminator          |
| <i>L. enzymogenes</i> VKM B-2235 <sup>T</sup> DNA | 0.14                             | To amplify a 199 bp promoter GroEL                                                                |
| pTurboGFP-B                                       | 1.58                             | To amplify a 705 bp <i>gfp</i>                                                                    |
| pEX18                                             | 8.39                             | To amplify a 230 bp <i>rrnB</i> T1 and T2 transcriptional terminators                             |
| PBBR1-MCS5 P <sub>GroEL</sub> - <i>gfp</i>        | 3.18                             | To amplify a 200 bp promoter GroEL with modification                                              |
| <i>L. capsici</i> VKM B-2533 <sup>T</sup> DNA     | 0.31                             | To amplify a 1143 bp <i>blp</i> for construction of PBBR1-MCS5 P <sub>GroEL(A)</sub> - <i>blp</i> |
| PBBR1-MCS5 P <sub>GroEL</sub> - <i>blp</i>        | 1.94                             | To amplify a 1143 bp <i>blp</i> for construction of PBBR1-MCS5 P <sub>T5</sub> - <i>blp</i>       |
| <i>L. capsici</i> VKM B-2533 <sup>T</sup> DNA     | 0.31                             | To amplify a 1383 bp <i>serp</i>                                                                  |

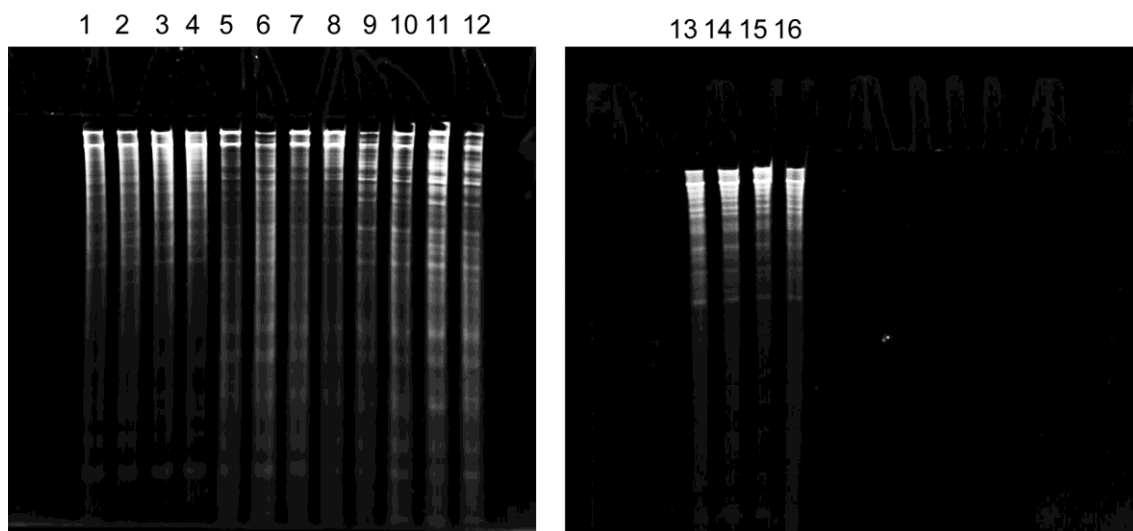

**Supplementary Figure S13.** 4% PAG with 8 M urea: 1, 2, 3, 4 – samples of wild-type *L. capsici* RNA; 5, 6, 7, 8 – samples of *L. capsici* P<sub>GroEL(A)</sub>-*blp* RNA; 9, 10, 11, 12 – samples of *L. capsici* P<sub>T5</sub>-*blp* RNA; 13, 14, 15, 16 – samples of *L. capsici* P<sub>T5</sub>-*serp* RNA.



**Supplementary Table S7.** Oligonucleotides used in this work for RT-qPCR.

| Gene          | locus tag<br>(Protein id)         | Sequence                           | Amplicon,<br>bp | PCR<br>efficiency |
|---------------|-----------------------------------|------------------------------------|-----------------|-------------------|
| <i>gntR</i> * | IEQ11_RS12995<br>(WP_036104172.1) | GntR_(for)<br>TATCGCCAGCTCAAGGAACG | 125             | 1.97              |
|               |                                   | GntR_(rev)<br>CGCGAGACAGTGATGGGATT |                 |                   |
| <i>alpA</i>   | IEQ11_RS15580<br>(WP_191823338.1) | AlpA_(for)<br>CTGCAGACCGAAAACTCGC  | 196             | 1.94              |
|               |                                   | AlpA_(rev)<br>GCAACTGCTTGAGGCTATGC |                 |                   |
| <i>blp</i>    | IEQ11_RS04180<br>(WP_191821694.1) | Blp_(for)<br>GGGAGCAAGAATCACGCTGT  | 154             | 1.92              |
|               |                                   | Blp_(rev)<br>GTGCTTGCCAGATAGGTG    |                 |                   |
| <i>serp</i>   | IEQ11_RS08595<br>(WP_191822808.1) | Serp_(for)<br>ATCCGCAAGAACGCACCTTG | 58              | 2.07              |
|               |                                   | Serp_(rev)<br>GGATCGAGAAGCAGGACAGG |                 |                   |

\* reference gene
